# Supplementary material for: Improving the luminescence thermal stability of Ca3Y2Ge3O12:Cr3+ based on cation substitution and its application in NIR LEDs
Source: Royal Society of Chemistry journal article supplement (doi:10.1039/d2ma00009a), 2022-01-01
Supplement: d2ma00009a1.pdf [file d2ma00009a1.pdf]

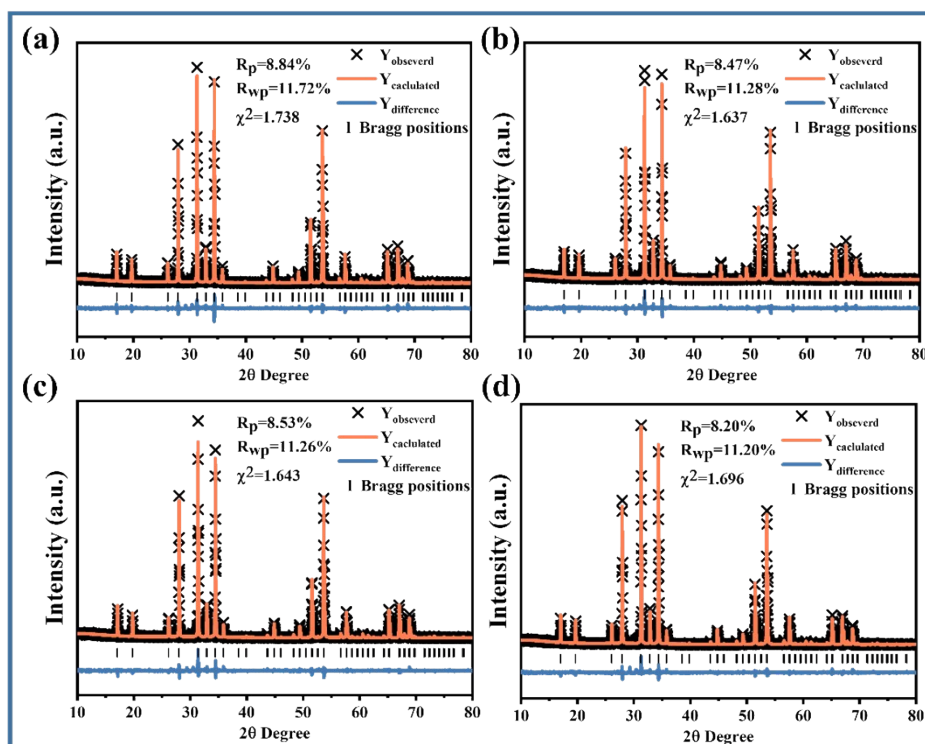

Fig.S1 Rietveld refinements results of  $\text{Ca}_{3-x}\text{Sr}_x\text{Y}_{1.99}\text{Ge}_3\text{O}_{12}:0.01\text{Cr}^{3+}$  ( $x=0, 0.05, 0.07, 0.10$ ).

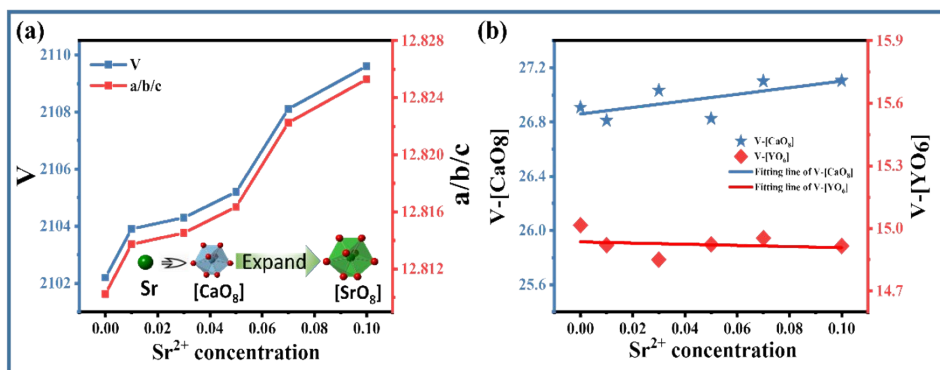

Fig.S2 The cell volume  $V$  and cell parameter  $a/b/c$  of  $\text{Ca}_{3-x}\text{Sr}_x\text{Y}_{1.99}\text{Ge}_3\text{O}_{12}:0.01\text{Cr}^{3+}$  ( $x=0, 0.05, 0.07, 0.10$ ); (b) the volume of  $[\text{CaO}_8]$  and  $[\text{YO}_6]$ .

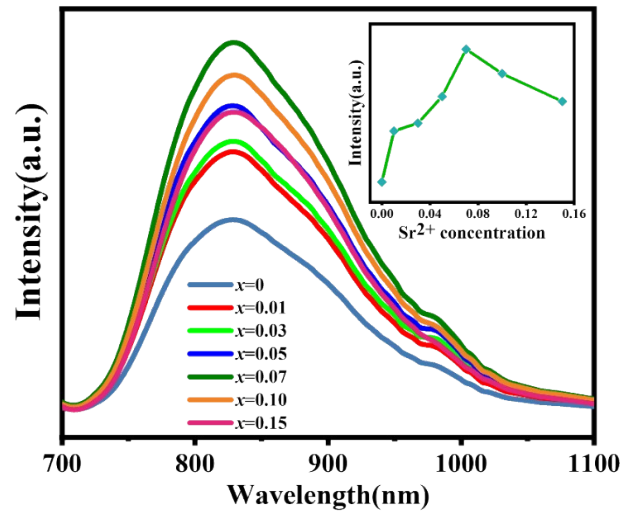

Fig.S3 Emission spectra of  $\text{Ca}_{3-x}\text{Sr}_x\text{Y}_{1.99}\text{Ge}_3\text{O}_{12}:0.01\text{Cr}^{3+}$  ( $\lambda_{\text{ex}}=475$  nm).
